# Supplementary material for: Daily temperature cycles prolong lifespan and have sex-specific effects on peripheral clock gene expression in Drosophila melanogaster
Source: Oxford University Press journal article supplement (doi:10.1242/jeb.233213), 2021-03-23
Supplement: jeb233213supp.pdf [file jeb233213supp.pdf]

**Table S1. Primer sequences used in the study.**

| Gene              | Forward sequence (5' → 3') | Reverse sequence (5' → 3') | Product size (bp) |
|-------------------|----------------------------|----------------------------|-------------------|
| <i>SdhA</i> [1]   | CATGCTGCTGTGTTCCGCGA       | ACCATCCAGGGGCTTGCTGA       | 133               |
| <i>Act5C</i> [1]  | GGCGCAGAGCAAGCGTGGTA       | GGGTGCCACACGCAGCTCAT       | 124               |
| <i>RpL32</i> [2]  | ATGCTAAGCTGTCGCACAAATG     | GTTTCGATCCGTAACCGATGT      | 107               |
| <i>eEF1α2</i> [2] | GCGTGGGTTTGTGATCAGTT       | GATCTTCTCCTTGCCCATCC       | 125               |
| <i>Clk</i>        | TCGCTGGTCAACGATCTCAG       | GCGATCGGTGGCCTCATTAT       | 117               |
| <i>cyc</i> [3]    | TGGACAATCACCCGAACATAC      | CTGAGGCAGGAAACCAATCA       | 113               |
| <i>per</i> [4]    | TGATGGGCGACTACAACCTCC      | GTCGCTATTCCCATTGCTGT       | 89                |
| <i>tim</i> [4]    | GGTGGCATCTGTGTACGAAA       | GATCTCGGTTGCTCAAGTC        | 118               |
| <i>Pdp1</i>       | GGCCACATAACCACAAAGCG       | GGAGGCGAACGAAAATGTTGA      | 108               |
| <i>vri</i> [4]    | ATGAACAACGTCCGGCTATC       | CTGCGGACTTATGGATCCTC       | 114               |
| <i>cry</i>        | AGGAATTTGTTACGAGCCCT       | GCTCCGATAATGGACTCCG        | 84                |
| <i>Hsp83</i>      | CATACAAGATGCCAGAAGAAGCA    | AGATCAACTCGCGCAGGAAA       | 120               |
| <i>Fst</i>        | ATCGTGCAGGAACAGAGGTG       | TGACCATTTTCGCCATCCCA       | 86                |
| <i>smp-30</i> [5] | GAAGGACCATTGTTCCCTGA       | TGGGTGGTTGGAATTTTGTAT      | 140               |

## References

- Ling D, Salvaterra PM. Robust RT-qPCR data normalization: validation and selection of internal reference genes during post-experimental data analysis. *PLoS One*. 2011;6(3):e17762. Epub 2011/03/23. doi: 10.1371/journal.pone.0017762. PubMed PMID: 21423626; PubMed Central PMCID: PMC3058000.
- Ponton F, Chapuis M-P, Pernice M, Sword GA, Simpson SJ. Evaluation of potential reference genes for reverse transcription-qPCR studies of physiological responses in *Drosophila melanogaster*. *Journal of Insect Physiology*. 2011;57(6):840-50. Epub 2011/03/26. doi: 10.1016/j.jinsphys.2011.03.014. PubMed PMID: 21435341.
- Liu T, Mahesh G, Yu W, Hardin PE. CLOCK stabilizes CYCLE to initiate clock function in *Drosophila*. *Proceedings of the National Academy of Sciences*. 2017;114(41):201707143. Epub 2017/10/05. doi: 10.1073/pnas.1707143114. PubMed PMID: 28973907; PubMed Central PMCID: PMC5642697.
- Yu W, Zheng H, Price JL, Hardin PE. DOUBLETIME plays a noncatalytic role to mediate CLOCK phosphorylation and repress CLOCK-dependent transcription within the *Drosophila* circadian clock. *Molecular and Cellular Biology*. 2009;29(6):1452-8.
- Sinclair B, Gibbs A, Roberts S. Gene transcription during exposure to, and recovery from, cold and desiccation stress in *Drosophila melanogaster*. *Insect Molecular Biology*. 2007;16(4):435-43. Epub 2007/05/18. doi: 10.1111/j.1365-2583.2007.00739.x. PubMed PMID: 17506850.

Table S2. Three-way ANOVAs for the mesor, amplitude, and phase of gene expression in *Drosophila* heads.

|               | Gene                      | Main effects |         |             | Interaction |                   |                   |                         |
|---------------|---------------------------|--------------|---------|-------------|-------------|-------------------|-------------------|-------------------------|
|               |                           | Age          | Sex     | Temperature | Age x Sex   | Age x Temperature | Sex x Temperature | Age x Sex x Temperature |
| Mesor         | <i>Clk</i>                | <0.0001      | 0.000   | <0.0001     | 0.951       | <0.0001           | 0.794             | 0.312                   |
|               | <i>cyc</i>                | <0.0001      | <0.0001 | 0.528       | 0.014       | <0.0001           | 0.162             | 0.446                   |
|               | <i>per</i>                | <0.0001      | 0.004   | 0.036       | 0.224       | 0.000             | 0.911             | 0.042                   |
|               | <i>tim</i>                | 0.013        | <0.0001 | <0.0001     | 0.290       | <0.0001           | 0.118             | 0.003                   |
|               | <i>Pdp1</i>               | <0.0001      | <0.0001 | <0.0001     | 0.345       | <0.0001           | 0.005             | <0.0001                 |
|               | <i>vri</i>                | <0.0001      | 0.005   | <0.0001     | 0.044       | 0.000             | 0.012             | 0.950                   |
|               | <i>cry</i>                | 0.024        | 0.022   | 0.901       | 0.093       | 0.076             | 0.038             | 0.094                   |
|               | <i>Hsp83</i>              | <0.0001      | 0.507   | 0.276       | 0.306       | <0.0001           | <0.0001           | 0.177                   |
|               | <i>Fst</i>                | 0.030        | 0.341   | 0.004       | 0.197       | 0.114             | 0.847             | 0.215                   |
|               | <i>smp-30</i>             | <0.0001      | <0.0001 | 0.006       | 0.000       | 0.187             | 0.165             | 0.031                   |
| Amplitude     | <i>Clk</i> <sup>^</sup>   | <0.0001      | -       | <0.0001     | -           | 0.001             | -                 | -                       |
|               | <i>Clk</i> <sup>†</sup>   | -            | 0.008   | 0.208       | -           | -                 | 0.546             | -                       |
|               | <i>cyc</i> <sup>*</sup>   | 0.188        | 0.032   | -           | 0.977       | -                 | -                 | -                       |
|               | <i>per</i>                | 0.001        | 0.089   | 0.001       | 0.572       | 0.143             | 0.940             | 0.248                   |
|               | <i>tim</i>                | 0.790        | <0.0001 | <0.0001     | 0.510       | <0.0001           | 0.115             | 0.015                   |
|               | <i>Pdp1</i>               | 0.001        | 0.020   | 0.016       | 0.371       | <0.0001           | 0.025             | 0.047                   |
|               | <i>vri</i>                | 0.646        | 0.101   | 0.089       | 0.218       | 0.055             | 0.004             | 0.875                   |
|               | <i>cry</i> <sup>‡</sup>   | 0.571        | -       | 0.068       | -           | 0.061             | -                 | -                       |
|               | <i>cry</i> <sup>†</sup>   | -            | 0.306   | 0.001       | -           | -                 | 0.019             | -                       |
|               | <i>Hsp83</i> <sup>*</sup> | <0.0001      | <0.0001 | -           | 0.838       | -                 | -                 | -                       |
|               | <i>Fst</i>                | NA           | NA      | NA          | NA          | NA                | NA                | NA                      |
| <i>smp-30</i> | NA                        | NA           | NA      | NA          | NA          | NA                | NA                |                         |
| Phase         | <i>Clk</i> <sup>^</sup>   | 0.206        | -       | 0.078       | -           | 0.151             | -                 | -                       |
|               | <i>Clk</i>                | -            | 0.078   | <0.0001     | -           | -                 | 0.360             | -                       |
|               | <i>cyc</i> <sup>*</sup>   | 0.394        | 0.637   | -           | 0.111       | -                 | -                 | -                       |
|               | <i>per</i>                | 0.372        | 0.795   | <0.0001     | 0.777       | 0.903             | 0.973             | 0.499                   |
|               | <i>tim</i>                | 0.903        | 0.458   | 0.396       | 0.110       | 0.898             | 0.042             | 0.785                   |
|               | <i>Pdp1</i>               | 0.393        | 0.831   | 0.050       | 0.773       | 0.872             | 0.041             | 0.028                   |
|               | <i>vri</i>                | 0.636        | 0.211   | 0.004       | 0.092       | 0.017             | 0.648             | 0.431                   |
|               | <i>cry</i> <sup>‡</sup>   | 0.426        | -       | 0.002       | -           | 0.001             | -                 | -                       |
|               | <i>cry</i> <sup>†</sup>   | -            | 0.547   | 0.049       | -           | -                 | 0.063             | -                       |
|               | <i>Hsp83</i> <sup>*</sup> | 0.001        | 0.858   | -           | 0.006       | -                 | -                 | -                       |
|               | <i>Fst</i>                | NA           | NA      | NA          | NA          | NA                | NA                | NA                      |
| <i>smp-30</i> | NA                        | NA           | NA      | NA          | NA          | NA                | NA                |                         |

Bold text show significant values ( $p < 0.05$ ). CircaCompare was used to make pairwise comparisons of simple effects where main effects or interactions were significant. Two-way ANOVAs were performed when one or more profiles being compared were non-rhythmic ( $p > 0.05$ ) and a three-way ANOVA could not be performed. Missing values denoted by 'NA' are shown when neither a three-way or a two-way ANOVA could be computed from the available rhythmic profiles. In these cases, pairwise comparisons were made using CircaCompare. Rhythmicity was not taken into account in the calculation for mesor, so three-way ANOVAs were performed. The following annotations indicate the configurations of the two-way ANOVAs: *cyc*<sup>\*</sup>, a two-way ANOVA was performed (2 levels sex, 2 levels age) for the  $T_{cyc}$  profiles; *Clk*<sup>^</sup>, a two-way ANOVA was performed (2 levels age, 2 levels temperature) for the male profiles; *Clk*<sup>†</sup>, a two-way ANOVA was performed (2 levels sex, 2 levels temperature) for the aged profiles; *cry*<sup>‡</sup>, a two-way ANOVA was performed (2 levels age, 2 levels temperature) for the female profiles; *cry*<sup>†</sup>, a two-way ANOVA was performed (2 levels sex, 2 levels temperature) for the aged profiles; *Hsp83*<sup>\*</sup> a two-way ANOVA was performed (2 levels sex, 2 levels age) for the  $T_{cyc}$  profiles.

Table S3. Table of p-values of pairwise comparisons made in CircaCompare for gene expression in *Drosophila* heads.

|           | Heads                 |                  |                  | <i>Clk</i>   | <i>cyc</i>   | <i>per</i>   | <i>tim</i>   | <i>Pdp1</i>  | <i>vri</i>   | <i>cry</i>   | <i>Hsp83</i> | <i>Fst</i>   | <i>smp-30</i> |              |
|-----------|-----------------------|------------------|------------------|--------------|--------------|--------------|--------------|--------------|--------------|--------------|--------------|--------------|---------------|--------------|
| Mesor     | Effect of age         | Male             | T <sub>CON</sub> | 0.239        | <b>0.000</b> | <b>0.014</b> | <b>0.000</b> | 0.083        | 0.158        | <b>0.000</b> | <b>0.000</b> | 0.130        | <b>0.000</b>  |              |
|           |                       |                  | T <sub>CYC</sub> | <b>0.000</b> | 0.878        | <b>0.000</b> | 0.398         | <b>0.013</b> |
|           |                       | Female           | T <sub>CON</sub> | <b>0.011</b> | <b>0.000</b> | <b>0.000</b> | <b>0.000</b> | <b>0.020</b> | 0.414        | 0.369        | <b>0.000</b> | <b>0.000</b> | 0.185         | <b>0.000</b> |
|           |                       |                  | T <sub>CYC</sub> | <b>0.000</b> | <b>0.000</b> | <b>0.003</b> | <b>0.000</b> | <b>0.000</b> | <b>0.001</b> | 0.697        | <b>0.000</b> | <b>0.000</b> | 0.104         | <b>0.000</b> |
|           | Effect of temperature | Male             | Young            | <b>0.000</b> | 0.183        | 0.148        | <b>0.000</b> | <b>0.000</b> | <b>0.002</b> | 0.216        | 0.758        | 0.798        | 0.645         |              |
|           |                       |                  | Aged             | 0.465        | <b>0.005</b> | <b>0.000</b> | 0.370        | <b>0.006</b> | <b>0.016</b> | <b>0.046</b> | <b>0.000</b> | <b>0.000</b> | 0.067         | <b>0.000</b> |
|           |                       | Female           | Young            | <b>0.000</b> | <b>0.009</b> | 0.849        | <b>0.000</b> | <b>0.000</b> | <b>0.002</b> | 0.194        | <b>0.001</b> | <b>0.022</b> | <b>0.000</b>  |              |
|           |                       |                  | Aged             | 0.545        | 0.222        | <b>0.039</b> | 0.170        | 0.052        | 0.426        | <b>0.000</b> | 0.414        | <b>0.000</b> | <b>0.000</b>  |              |
|           | Effect of gender      | T <sub>CON</sub> | Young            | <b>0.017</b> | <b>0.004</b> | <b>0.002</b> | <b>0.000</b> | <b>0.000</b> | 0.080        | <b>0.000</b> | <b>0.015</b> | 0.176        | <b>0.000</b>  |              |
|           |                       |                  | Aged             | <b>0.003</b> | <b>0.000</b> | 0.055        | <b>0.000</b> | <b>0.000</b> | <b>0.000</b> | 0.121        | <b>0.000</b> | 0.252        | 0.075         |              |
|           |                       | T <sub>CYC</sub> | Young            | 0.308        | <b>0.031</b> | 0.927        | 0.488        | 0.223        | 0.601        | 0.959        | 0.178        | 0.479        | 0.188         |              |
|           |                       |                  | Aged             | <b>0.001</b> | <b>0.000</b> | <b>0.009</b> | <b>0.000</b> | <b>0.000</b> | 0.081        | 0.756        | <b>0.001</b> | <b>0.005</b> | <b>0.000</b>  |              |
| Amplitude | Effect of age         | Male             | T <sub>CON</sub> | 0.676        | n.r.         | 0.342        | <b>0.000</b> | <b>0.043</b> | 0.838        | <b>0.009</b> | #            | 0.246        | #             |              |
|           |                       |                  | T <sub>CYC</sub> | <b>0.000</b> | 0.435        | <b>0.017</b> | <b>0.014</b> | <b>0.001</b> | 0.154        | #            | <b>0.000</b> | #            | n.r.          |              |
|           |                       | Female           | T <sub>CON</sub> | 0.639        | n.r.         | <b>0.005</b> | <b>0.005</b> | 0.149        | 0.079        | <b>0.023</b> | #            | 0.690        | #             |              |
|           |                       |                  | T <sub>CYC</sub> | #            | 0.147        | 0.245        | <b>0.005</b> | <b>0.004</b> | 0.564        | 0.438        | <b>0.000</b> | 0.604        | #             |              |
|           | Effect of temperature | Male             | Young            | <b>0.000</b> | #            | 0.749        | <b>0.000</b> | <b>0.000</b> | 0.051        | #            | #            | 0.547        | #             |              |
|           |                       |                  | Aged             | 0.253        | #            | <b>0.003</b> | 0.171        | 0.385        | 0.109        | 0.487        | <b>0.000</b> | #            | n.r.          |              |
|           |                       | Female           | Young            | #            | #            | 0.141        | <b>0.000</b> | 0.450        | 0.771        | 0.981        | <b>0.000</b> | 0.435        | #             |              |
|           |                       |                  | Aged             | 0.581        | #            | <b>0.041</b> | 0.677        | <b>0.036</b> | <b>0.025</b> | <b>0.000</b> | #            | 0.278        | #             |              |
|           | Effect of gender      | T <sub>CON</sub> | Young            | 0.522        | n.r.         | <b>0.043</b> | <b>0.000</b> | <b>0.007</b> | 0.076        | 0.133        | #            | 0.544        | 0.361         |              |
|           |                       |                  | Aged             | <b>0.009</b> | n.r.         | 0.292        | <b>0.000</b> | <b>0.032</b> | <b>0.000</b> | 0.338        | #            | 0.159        | n.r.          |              |
|           |                       | T <sub>CYC</sub> | Young            | #            | 0.261        | 0.983        | 0.434        | 0.742        | 0.429        | #            | <b>0.004</b> | 0.437        | n.r.          |              |
|           |                       |                  | Aged             | 0.193        | <b>0.035</b> | 0.132        | <b>0.000</b> | 0.479        | 0.933        | <b>0.022</b> | <b>0.000</b> | #            | #             |              |
| Phase     | Effect of age         | Male             | T <sub>CON</sub> | <b>0.008</b> | n.r.         | 0.252        | 0.093        | 0.133        | 0.520        | 0.445        | n.r.         | n.r.         | n.r.          |              |
|           |                       |                  | T <sub>CYC</sub> | 0.927        | 0.091        | 0.805        | 0.708        | 0.330        | 0.054        | n.r.         | <b>0.001</b> | n.r.         | n.r.          |              |
|           |                       | Female           | T <sub>CON</sub> | 0.216        | n.r.         | 0.863        | 0.094        | <b>0.012</b> | <b>0.045</b> | <b>0.031</b> | n.r.         | n.r.         | n.r.          |              |
|           |                       |                  | T <sub>CYC</sub> | n.r.         | 0.579        | 0.603        | 0.337        | 0.595        | 0.806        | <b>0.013</b> | 0.711        | n.r.         | n.r.          |              |
|           | Effect of temperature | Male             | Young            | 0.863        | n.r.         | <b>0.016</b> | 0.607        | 0.438        | 0.830        | n.r.         | n.r.         | n.r.         | n.r.          |              |
|           |                       |                  | Aged             | <b>0.001</b> | n.r.         | <b>0.002</b> | 0.530        | 0.063        | <b>0.000</b> | <b>0.017</b> | 0.607        | n.r.         | n.r.          |              |
|           |                       | Female           | Young            | n.r.         | n.r.         | <b>0.029</b> | 0.083        | 0.068        | 0.320        | <b>0.004</b> | 0.586        | n.r.         | n.r.          |              |
|           |                       |                  | Aged             | <b>0.007</b> | n.r.         | <b>0.000</b> | <b>0.014</b> | <b>0.011</b> | <b>0.000</b> | 0.932        | n.r.         | n.r.         | n.r.          |              |
|           | Effect of gender      | T <sub>CON</sub> | Young            | 0.100        | n.r.         | 0.637        | <b>0.006</b> | <b>0.031</b> | 0.304        | 0.171        | n.r.         | n.r.         | <b>0.023</b>  |              |
|           |                       |                  | Aged             | <b>0.028</b> | n.r.         | 0.271        | 0.622        | 0.225        | 0.937        | 0.401        | n.r.         | n.r.         | n.r.          |              |
|           |                       | T <sub>CYC</sub> | Young            | n.r.         | 0.281        | 0.843        | 0.737        | 0.309        | 0.233        | n.r.         | 0.277        | n.r.         | n.r.          |              |
|           |                       |                  | Aged             | 0.599        | 0.471        | 0.933        | <b>0.002</b> | 0.734        | 0.536        | 0.061        | <b>0.015</b> | n.r.         | n.r.          |              |

Bold text show significant values ( $p < 0.05$ ). 'n.r.' indicate comparisons where one or both profiles being compared were non-rhythmic ( $p > 0.05$ ). The annotation '#' indicate significant changes in rhythmicity, where a rhythmic profile was being compared with a non-rhythmic profile, and was considered a significant change in amplitude.

Table S4. Three-way ANOVAs for the mesor, amplitude, and phase of gene expression in *Drosophila* bodies.

|               |               | Main effects |              |              | Interaction  |                   |                   |                         |
|---------------|---------------|--------------|--------------|--------------|--------------|-------------------|-------------------|-------------------------|
|               |               | Age          | Sex          | Temperature  | Age x Sex    | Age x Temperature | Sex x Temperature | Age x Sex x Temperature |
| Mesor         | <i>Clk</i>    | 0.278        | <0.0001      | <b>0.017</b> | <b>0.019</b> | 0.787             | <b>0.004</b>      | 0.112                   |
|               | <i>cyc</i>    | <0.0001      | <0.0001      | <b>0.025</b> | <b>0.004</b> | 0.482             | <b>0.020</b>      | 0.230                   |
|               | <i>per</i>    | 0.409        | <0.0001      | 0.185        | 0.288        | 0.547             | 0.495             | 0.250                   |
|               | <i>tim</i>    | <0.0001      | <0.0001      | 0.134        | <0.0001      | <b>0.001</b>      | <b>0.040</b>      | <b>0.001</b>            |
|               | <i>Pdp1</i>   | <0.0001      | <0.0001      | 0.053        | <0.0001      | <b>0.038</b>      | <0.0001           | <b>0.011</b>            |
|               | <i>vri</i>    | 0.352        | <0.0001      | <b>0.004</b> | 0.332        | 0.343             | 0.796             | 0.233                   |
|               | <i>cry</i>    | <0.0001      | <0.0001      | <b>0.017</b> | <0.0001      | 0.524             | 0.109             | 0.404                   |
|               | <i>Hsp83</i>  | <0.0001      | <0.0001      | 0.101        | <0.0001      | <b>0.006</b>      | 0.575             | <b>0.044</b>            |
|               | <i>Fst</i>    | 0.148        | <b>0.015</b> | <b>0.004</b> | 0.745        | <b>0.012</b>      | 0.427             | 0.658                   |
| <i>smp-30</i> | <0.0001       | <0.0001      | <0.0001      | <0.0001      | <0.0001      | <0.0001           | <0.0001           |                         |
| Amplitude     | <i>Clk</i>    | <b>0.039</b> | <0.0001      | 0.132        | 0.511        | 0.298             | 0.106             | 0.667                   |
|               | <i>cyc</i>    | NA           | NA           | NA           | NA           | NA                | NA                | NA                      |
|               | <i>per</i>    | 0.646        | <0.0001      | <0.0001      | 0.713        | 0.086             | 0.053             | 0.076                   |
|               | <i>tim</i>    | <0.0001      | <0.0001      | <0.0001      | <0.0001      | <b>0.001</b>      | <b>0.005</b>      | <b>0.000</b>            |
|               | <i>Pdp1</i>   | <b>0.011</b> | <0.0001      | <b>0.017</b> | <0.0001      | <b>0.002</b>      | <b>0.001</b>      | <b>0.028</b>            |
|               | <i>vri</i>    | 0.145        | <0.0001      | <b>0.026</b> | <b>0.016</b> | 0.174             | 0.906             | 0.146                   |
|               | <i>cry</i>    | <0.0001      | <0.0001      | 0.182        | <0.0001      | 0.251             | 0.598             | 0.432                   |
|               | <i>Hsp83*</i> | <b>0.005</b> | <b>0.032</b> | -            | 0.271        | -                 | -                 | -                       |
|               | <i>Fst</i>    | NA           | NA           | NA           | NA           | NA                | NA                | NA                      |
| <i>smp-30</i> | NA            | NA           | NA           | NA           | NA           | NA                | NA                |                         |
| Phase         | <i>Clk</i>    | 0.696        | 0.159        | <0.0001      | 0.421        | 0.506             | 0.897             | 0.274                   |
|               | <i>cyc</i>    | NA           | NA           | NA           | NA           | NA                | NA                | NA                      |
|               | <i>per</i>    | 0.518        | 0.161        | <b>0.007</b> | 0.735        | 0.207             | 0.637             | 0.727                   |
|               | <i>tim</i>    | <b>0.007</b> | <b>0.002</b> | <b>0.029</b> | 0.113        | 0.215             | 0.300             | 0.521                   |
|               | <i>Pdp1</i>   | 0.703        | 0.071        | <b>0.028</b> | 0.527        | 0.471             | 0.391             | 0.582                   |
|               | <i>vri</i>    | 0.280        | 0.374        | 0.069        | 0.417        | <b>0.002</b>      | 0.912             | 0.730                   |
|               | <i>cry</i>    | 0.872        | 0.702        | 0.106        | 0.625        | 0.948             | 0.276             | 0.657                   |
|               | <i>Hsp83*</i> | 0.065        | <b>0.007</b> | -            | <b>0.046</b> | -                 | -                 | -                       |
|               | <i>Fst</i>    | NA           | NA           | NA           | NA           | NA                | NA                | NA                      |
| <i>smp-30</i> | NA            | NA           | NA           | NA           | NA           | NA                | NA                |                         |

Bold text show significant values ( $p < 0.05$ ). CircaCompare was used to make pairwise comparisons of simple effects where main effects or interactions were significant. Two-way ANOVAs were performed when one or more profiles being compared were non-rhythmic ( $p > 0.05$ ) and a three-way ANOVA could not be performed. Missing values denoted by 'NA' are shown when neither a three-way or a two-way ANOVA could be computed from the available rhythmic profiles. In these cases, pairwise comparisons were made using CircaCompare. Rhythmicity was not taken into account in the calculation for mesor, so three-way ANOVAs were performed. *hsp\** indicates a two-way ANOVA (2 levels age, 2 levels sex) was performed for the  $T_{CVC}$  profiles for *Hsp83*.

Table S5. Table of p-values of pairwise comparisons made in CircaCompare for gene expression in *Drosophila* bodies.

|           |                       | Bodies           |                  | <i>Clk</i>   | <i>cyc</i>   | <i>per</i>   | <i>tim</i>   | <i>Pdp1</i>  | <i>vri</i>   | <i>cry</i>   | <i>Hsp83</i> | <i>Fst</i>   | <i>smp-30</i> |              |
|-----------|-----------------------|------------------|------------------|--------------|--------------|--------------|--------------|--------------|--------------|--------------|--------------|--------------|---------------|--------------|
| Mesor     | Effect of age         | Male             | T <sub>CON</sub> | <b>0.005</b> | 0.166        | 0.270        | <b>0.000</b> | <b>0.000</b> | 0.414        | <b>0.000</b> | <b>0.000</b> | 0.197        | <b>0.000</b>  |              |
|           |                       |                  | T <sub>CYC</sub> | 0.620        | 0.126        | 0.586        | <b>0.001</b> | <b>0.000</b> | 0.539        | <b>0.000</b> | <b>0.001</b> | <b>0.013</b> | <b>0.000</b>  |              |
|           |                       | Female           | T <sub>CON</sub> | <b>0.043</b> | 0.211        | <b>0.022</b> | 0.281        | <b>0.023</b> | 0.090        | <b>0.000</b> | <b>0.000</b> | 0.088        | <b>0.000</b>  |              |
|           |                       |                  | T <sub>CYC</sub> | 0.969        | <b>0.003</b> | 0.070        | 0.348        | <b>0.002</b> | 0.092        | <b>0.000</b> | <b>0.000</b> | <b>0.006</b> | 0.165         |              |
|           | Effect of temperature | Male             | Young            | 0.213        | 0.281        | 0.922        | 0.055        | 0.224        | 0.077        | 0.592        | 0.839        | 0.364        | 0.685         |              |
|           |                       |                  | Aged             | <b>0.003</b> | <b>0.050</b> | 0.150        | <b>0.001</b> | <b>0.000</b> | 0.271        | <b>0.000</b> | <b>0.006</b> | <b>0.021</b> | <b>0.000</b>  |              |
|           |                       | Female           | Young            | 0.491        | 0.356        | 0.289        | <b>0.007</b> | <b>0.039</b> | 0.590        | 0.549        | 0.422        | 0.980        | <b>0.003</b>  |              |
|           |                       |                  | Aged             | 0.158        | <b>0.012</b> | 0.912        | <b>0.003</b> | <b>0.009</b> | <b>0.000</b> | 0.268        | <b>0.001</b> | <b>0.007</b> | <b>0.000</b>  |              |
|           | Effect of gender      | T <sub>CON</sub> | Young            | <b>0.000</b> | <b>0.001</b> | <b>0.000</b>  |              |
|           |                       |                  | Aged             | <b>0.000</b> | 0.211        | <b>0.000</b>  |              |
|           |                       | T <sub>CYC</sub> | Young            | <b>0.000</b> | <b>0.000</b> | <b>0.005</b> | <b>0.000</b> | <b>0.000</b> | <b>0.000</b> | <b>0.000</b> | <b>0.000</b> | <b>0.000</b> | <b>0.003</b>  | <b>0.000</b> |
|           |                       |                  | Aged             | <b>0.000</b>  | <b>0.000</b> |
| Amplitude | Effect of age         | Male             | T <sub>CON</sub> | <b>0.023</b> | n.r.         | <b>0.003</b> | <b>0.000</b> | <b>0.000</b> | <b>0.015</b> | <b>0.000</b> | #            | n.r.         | n.r.          |              |
|           |                       |                  | T <sub>CYC</sub> | 0.696        | 0.514        | 0.476        | <b>0.045</b> | 0.225        | 0.695        | <b>0.000</b> | <b>0.000</b> | 0.174        | #             |              |
|           |                       | Female           | T <sub>CON</sub> | 0.104        | n.r.         | 0.947        | 0.184        | 0.262        | 0.406        | <b>0.000</b> | n.r.         | n.r.         | #             |              |
|           |                       |                  | T <sub>CYC</sub> | 0.562        | n.r.         | 0.913        | 0.634        | <b>0.025</b> | 0.484        | <b>0.010</b> | 0.294        | #            | n.r.          |              |
|           | Effect of temperature | Male             | Young            | 0.551        | #            | 0.319        | 0.924        | 0.839        | 0.807        | 0.988        | <b>0.000</b> | #            | n.r.          |              |
|           |                       |                  | Aged             | <b>0.049</b> | #            | <b>0.000</b> | <b>0.000</b> | <b>0.000</b> | 0.058        | <b>0.000</b> | #            | #            | #             |              |
|           |                       | Female           | Young            | 0.553        | n.r.         | <b>0.039</b> | 0.147        | 0.267        | <b>0.041</b> | 0.780        | #            | n.r.         | #             |              |
|           |                       |                  | Aged             | 0.691        | n.r.         | <b>0.010</b> | 0.401        | 0.940        | 0.105        | <b>0.027</b> | #            | #            | n.r.          |              |
|           | Effect of gender      | T <sub>CON</sub> | Young            | <b>0.000</b> | n.r.         | <b>0.000</b> | <b>0.000</b> | <b>0.000</b> | <b>0.000</b> | <b>0.000</b> | #            | n.r.         | n.r.          |              |
|           |                       |                  | Aged             | <b>0.000</b> | n.r.         | <b>0.000</b> | <b>0.000</b> | <b>0.049</b> | <b>0.000</b> | 0.211        | n.r.         | n.r.         | #             |              |
|           |                       | T <sub>CYC</sub> | Young            | <b>0.000</b> | #            | <b>0.002</b> | <b>0.000</b> | <b>0.000</b> | <b>0.000</b> | <b>0.000</b> | <b>0.000</b> | 0.093        | #             | #            |
|           |                       |                  | Aged             | <b>0.000</b> | #            | <b>0.000</b> | <b>0.000</b> | <b>0.000</b> | <b>0.000</b> | <b>0.000</b> | <b>0.000</b> | 0.321        | 0.985         | n.r.         |
| Phase     | Effect of age         | Male             | T <sub>CON</sub> | 0.299        | n.r.         | 0.402        | 0.226        | 0.405        | 0.130        | 0.857        | n.r.         | n.r.         | n.r.          |              |
|           |                       |                  | T <sub>CYC</sub> | 0.245        | <b>0.025</b> | 0.783        | 0.775        | 0.440        | 0.165        | 0.948        | <b>0.000</b> | 0.915        | n.r.          |              |
|           |                       | Female           | T <sub>CON</sub> | 0.705        | n.r.         | 0.181        | <b>0.012</b> | 0.691        | <b>0.024</b> | 0.638        | n.r.         | n.r.         | n.r.          |              |
|           |                       |                  | T <sub>CYC</sub> | 0.467        | n.r.         | 0.791        | 0.309        | 0.584        | 0.362        | 0.914        | 0.929        | n.r.         | n.r.          |              |
|           | Effect of temperature | Male             | Young            | <b>0.040</b> | n.r.         | 0.234        | 0.292        | 0.210        | 0.469        | 0.348        | 0.452        | n.r.         | n.r.          |              |
|           |                       |                  | Aged             | <b>0.000</b> | n.r.         | 0.131        | 0.758        | 0.383        | <b>0.035</b> | 0.054        | n.r.         | n.r.         | n.r.          |              |
|           |                       | Female           | Young            | <b>0.003</b> | n.r.         | 0.824        | <b>0.045</b> | 0.139        | 0.310        | 0.729        | n.r.         | n.r.         | n.r.          |              |
|           |                       |                  | Aged             | <b>0.031</b> | n.r.         | 0.113        | 0.518        | 0.373        | <b>0.009</b> | 0.930        | n.r.         | n.r.         | n.r.          |              |
|           | Effect of gender      | T <sub>CON</sub> | Young            | 0.414        | n.r.         | 0.421        | <b>0.048</b> | 0.176        | 0.384        | 0.952        | n.r.         | n.r.         | n.r.          |              |
|           |                       |                  | Aged             | 0.486        | n.r.         | 0.555        | 0.242        | 0.189        | 0.953        | 0.405        | n.r.         | n.r.         | n.r.          |              |
|           |                       | T <sub>CYC</sub> | Young            | 0.271        | n.r.         | 0.778        | 0.379        | 0.949        | 0.331        | 0.717        | 0.598        | n.r.         | n.r.          |              |
|           |                       |                  | Aged             | 0.893        | n.r.         | 0.785        | 0.668        | 0.141        | 0.893        | 0.313        | <b>0.000</b> | <b>0.002</b> | n.r.          |              |

Bold text show significant values ( $p < 0.05$ ). 'n.r.' indicate comparisons where one or both profiles being compared were non-rhythmic ( $p > 0.05$ ). The annotation '#' indicate significant changes in rhythmicity, where a rhythmic profile was being compared with a non-rhythmic profile, and was considered a significant change in amplitude.
